# L-DOPA enhances hippocampal direction signals in younger and older adults

Christoph Koch<sup>1,2,\*</sup>, Christian Bäuchl<sup>3</sup>, Franka Glöckner<sup>3</sup>, Philipp Riedel<sup>4</sup>, Johannes Petzold<sup>4</sup>,  
Michael Smolka<sup>4</sup>, Shu-Chen Li<sup>3,5</sup>, Nicolas W. Schuck<sup>1,6,\*</sup>

<sup>1</sup> Max Planck Research Group NeuroCode, Max Planck Institute for Human Development, Berlin, Germany

<sup>2</sup> International Max Planck Research School on the Life Course, Max Planck Institute for Human Development, Berlin, Germany

<sup>3</sup> Faculty of Psychology, Chair of Lifespan Developmental Neuroscience, Technische Universität Dresden, Dresden, Germany

<sup>4</sup> Department of Psychiatry and Neuroimaging Center, Technische Universität Dresden, Dresden, Germany

<sup>5</sup> Centre for Tactile Internet with Human-in-the-Loop (CeTI), Technische Universität, Dresden, Germany

<sup>6</sup> Max Planck UCL Centre for Computational Psychiatry and Aging Research, Berlin, Germany, and London, United Kingdom

---

\*Corresponding authors ([\[koch,schuck\]@mpib-berlin.mpg.de](mailto:[koch,schuck]@mpib-berlin.mpg.de))

## Abstract

1  
2 Previous studies indicate a role of dopamine in hippocampus-dependent spatial navi-  
3 gation. Although neural representations of direction are an important aspect of spatial  
4 cognition, it is not well understood whether dopamine directly affects these representations,  
5 or only impacts other aspects of spatial brain function. Moreover, both dopamine and spa-  
6 tial cognition decline sharply during age, raising the question which effect dopamine has  
7 on directional signals in the brain of older adults. To investigate these questions, we used  
8 a double-blind cross-over L-DOPA/Placebo intervention design in which 43 younger and 37  
9 older adults navigated in a virtual spatial environment while undergoing functional magnetic  
10 resonance imaging (fMRI). We studied the effect of L-DOPA, a DA precursor, on fMRI ac-  
11 tivation patterns that encode spatial walking directions that have previously been shown to  
12 lose specificity with age. This was done in predefined regions of interest, including the early  
13 visual cortex, retrosplenial cortex, and hippocampus. Classification of brain activation pat-  
14 terns associated with different walking directions was improved in the hippocampus and the  
15 retrosplenial cortex following L-DOPA administration. This suggests that DA enhances the  
16 specificity of neural representations of walking direction in these areas. In the hippocampus  
17 these results were found in both age groups, while in the RSC they were only observed in  
18 younger adults. Taken together, our study provides evidence for a mechanistic link between  
19 DA and the specificity of neural responses during spatial navigation.

20 **Significance Statement:** The sense of direction is an important aspect of spatial navi-  
21 gation, and neural representations of direction can be found throughout a large network of  
22 space-related brain regions. But what influences how well these representations track some-  
23 one's true direction? Using a double-blind cross-over L-DOPA/Placebo intervention design,  
24 we find causal evidence that the neurotransmitter dopamine impacts the fidelity of direction  
25 selective neural representations in the human hippocampus and retrosplenial cortex. Inter-  
26 estingly, the effect of L-DOPA was either equally present or even smaller in older adults,  
27 despite the well-known age related decline of dopamine. These results provide novel insights  
28 into how dopamine shapes the neural representations that underlie spatial navigation.

29 **Keywords:** spatial navigation; aging; neural dedifferentiation; tuning functions; fMRI;  
30 MVPA; dopamine

## 1 Introduction

A role of dopamine (DA) in spatial navigation is well established. Anatomically, spatial cognition depends on a network of brain regions centered around the hippocampus (HC) (Burgess, Maguire, & O’Keefe, 2002; Chersi & Burgess, 2015) that is a target of dopaminergic innervation from the ventral tegmental area and the locus coeruleus (McNamara & Dupret, 2017). Behaviorally, spatial navigation abilities are influenced by DA functioning in younger as well as older animals and humans (Granado et al., 2008; El-Ghundi et al., 1999; Thurm et al., 2016; Kentros, Agnihotri, Streater, Hawkins, & Kandel, 2004).

Much less is known about how DA might change the neural representations that support spatial navigation. Particularly interesting for human neuroscience are direction selective representations (Taube, 2007), which have been found, amongst others, in the HC, the retrosplenial cortex (RSC) and visual cortex (Shine, Valdés-Herrera, Hegarty, & Wolbers, 2016; Flossmann & Rochefort, 2021; Guitchounts, Masís, Wolff, & Cox, 2020; Cacucci, Lever, Wills, Burgess, & O’Keefe, 2004), and can be decoded from human fMRI signals (Koch, Li, Polk, & Schuck, 2020). We hypothesized that DA affects direction encoding in the human brain and tested this idea using a double-blind placebo controlled intervention design. Specifically, we predicted that oral administration of L-DOPA, a dopamine precursor, would influence how accurately walking direction can be decoded from multi-voxel fMRI patterns.

Next to its role in spatial navigation, DA has also received much attention in the context of aging, where reduced DA functions are prevalent and are thought to underlie age-related cognitive declines (Bäckman, Nyberg, Lindenberger, Li, & Farde, 2006; Li, Lindenberger, & Bäckman, 2010; Volkow et al., 1998; Chowdhury et al., 2013). Computational models have shown that declining neuromodulatory effects of DA lead to losses in the signal-to-noise ratio of neural responses (Cohen & Servan-Schreiber, 1992; Servan-Schreiber, Printz, & Cohen, 1990), which in the aging brain can lead to neural representations that are less specific or ”dedifferentiated” (Li, Lindenberger, & Sikström, 2001; Li & Rieckmann, 2014). In line with these models, dedifferentiation has repeatedly been observed in older adults (OA) at the behavioral and neural levels (Park et al., 2004; Carp, Park, Polk, & Park, 2011; Carp, Park, Hebrank, Park, & Polk, 2011; Koch et al., 2020; Kobelt, Sommer, Keresztes, Werkle-Bergner, & Sander, 2021; Li et al., 2004). Neural dedifferentiation, in turn, has been

61 linked to decreased memory performance (Koen, Hauck, & Rugg, 2019; Sommer et al., 2019;  
62 St-Laurent, Abdi, Bondad, & Buchsbaum, 2014), establishing an explanatory link between  
63 DA, neural representations and cognitive aging.

64 These roles of DA in spatial navigation and aging might contribute to the pronounced  
65 decline in spatial cognition with age (Moffat, 2009; Lester, Moffat, Wiener, Barnes, & Wol-  
66 bers, 2017; Wolbers, Dudchenko, & Wood, 2014; Schuck, Doeller, Polk, Lindenberger, & Li,  
67 2015), and to the neural dedifferentiation of direction-selective (Koch et al., 2020) and hip-  
68 pocampal signals (Schuck et al., 2015) in the aging brain. Moreover, since the sharp decline  
69 of DA with age should lead to lower baseline availability of DA in OA, the effects of DA  
70 might be stronger in OA relative to younger adults (YA) – reflecting DA’s inverted-U-shape  
71 relation to cognitive performance (Cools & D’Esposito, 2011; Li et al., 2013; Vijayraghavan,  
72 Wang, Birnbaum, Williams, & Arnsten, 2007; Li et al., 2010). Indeed, one previous study  
73 found age-related effects of the DA receptor agonist bromocriptine on dedifferentiation in  
74 the HC (Abdulrahman, Fletcher, Bullmore, & Morcom, 2017). Moreover, HC-dependent  
75 episodic memory, spatial navigation, and learning have been found to be affected by genetic  
76 polymorphisms related to dopamine D2 receptor availability (COMT Val158Met, C957T CC;  
77 Papenberg et al., 2014; Li et al., 2013) or hippocampal function (KIBRA SNP rs17070145;  
78 Schuck et al., 2013, 2018) in OA, but not YA. Based on these findings, we therefore also tested  
79 whether L-DOPA effects on walking direction decoding would be stronger in OA relative to  
80 YA.

81 Finally, we expected that DA could also influence the shape of population-based tuning  
82 functions of direction. Although direction-sensitive cells often have a preferred direction,  
83 they also fire in response to non-preferred directions in proportion to their similarity to the  
84 preferred direction (Taube, 2007). Hence, encoding of direction information seems to follow a  
85 Gaussian tuning function, in particular on a population level (Averbeck, Latham, & Pouget,  
86 2006). Research has also shown that age-related neural dedifferentiation results in increased  
87 width of such tuning functions with age (Liang et al., 2010; Leventhal, Wang, Pu, Zhou, &  
88 Ma, 2003; Schmolesky, Wang, Pu, & Leventhal, 2000), which we too have reported previously  
89 using fMRI (Koch et al., 2020). We therefore also investigated whether L-DOPA has effects  
90 on the precision of fMRI-derived tuning functions of direction information and whether such

91 effects may interact with age.

## 92 **2 Materials and Methods**

### 93 **2.1 Participants**

94 This study was part of a larger project in which the same participants performed multiple  
95 tasks, including a sequential decision making task and a virtual reality spatial memory task  
96 inside the scanner and other decision tasks outside of the scanner.

97 Here, we only report results from the MRI analysis of the VR task described below.  
98 Specifically, following our previous publication ([Koch et al., 2020](#)), our analyses were specific  
99 to neural representations of direction signals during the spatial memory task performed while  
100 undergoing fMRI. Other data from the same participants was not within the purview of this  
101 study and was therefore not investigated. Data of 102 participants which were recruited for  
102 two MRI sessions and randomly assigned to one of the two drug intervention groups (i.e., L-  
103 DOPA–Placebo or Placebo–L-DOPA) was available for investigating our research question.  
104 Ninety-one of these participants (46 OA, 45 YA) successfully completed both sessions. Four  
105 OA were excluded from further analyses because they did not respond in at least a third  
106 of the trials in at least one of the two sessions. Furthermore, technical issues during data  
107 collection led to incomplete or inaccurate data for three other OA, resulting in an overall  
108 exclusion of 7 OA. The main sample therefore consisted of 84 participants, out of which 39  
109 were OA (age 65–75, 7 female) and 45 YA (age 26–35, 16 female). Note that the relatively  
110 low number of female OA reflects difficulties in recruitment after the onset of the COVID-19  
111 pandemic.

112 Decoding analyses of the L-DOPA effects introduced additional requirements for the  
113 distribution of walking direction (see Materials and Methods) that were not met for four  
114 participants (2 OA, 2 YA). Thus, the final effective sample for these analyses also excluded  
115 these participants and comprise of a total of 37 OA (age 65–75, 6 female) and 43 YA (age  
116 26–35, 16 female).

## 117 2.2 Virtual Reality Task

118 During each session of fMRI data collection participants had to complete a similar variant of  
119 a spatial memory task that was used in previous studies (Schuck et al., 2015; Thurm et al.,  
120 2016). Analyses of the present work are mainly concerned with directional signals obtained  
121 during free navigation, and hence focus on the corresponding task phases. Specifically, to  
122 avoid effects of changed environmental cues on directional signals (e.g. Taube, Muller, &  
123 Ranck, 1990) or initial learning, we considered only data from the feedback phase for this  
124 study (see below). On average, the included data reflected a period of 17.36 minutes from  
125 free navigation per session.

126 Briefly, participants were placed in a virtual, circular arena in which they could move  
127 around freely using a custom-made MRI-compatible joystick. The arena consisted of a  
128 circular grass plane surrounded by a wall. Participants could also see distal cues (mountains,  
129 clouds) as well as a local cue (traffic cone) to aid orientation (see Fig 1). We asked participants  
130 to remember the location of five objects within the 360°arena. First, an initial encoding  
131 phase took place in which participants could see and walk to the locations of all objects  
132 appearing one after the other. Learning of object location then continued in a feedback phase:  
133 participants were placed close to the center of the arena with a random heading direction.  
134 After the brief presentation of a grey screen and fixation cross, a picture of the first object  
135 was shown. Participants were asked to navigate as closely as possible to the location of this  
136 object and indicate their final position with a button press within a maximum of 60 seconds.  
137 To provide feedback, the true object location was shown to participants following their  
138 response, and they were then asked to navigate to and walk over the shown location. After  
139 the feedback, participants were shown another object and the procedure repeated without  
140 placing the player in the center of the arena until all five objects were completed. The order  
141 in which the five objects were shown was pseudo-randomized. Once all five objects were  
142 completed, participants were again placed close to the arena's center and had to navigate to  
143 all five objects in the same manner for a total of six repetitions (i.e.,  $5 \times 6 = 30$  feedback  
144 trials). In a final transfer phase of the task (data not analyzed in this study, see above),  
145 either the arena size or the location of the traffic cone were altered, and participants' object  
146 location memory was tested again as above. For the second session participants had to learn

147 the location of five different objects, but the trial structure and procedures were identical  
148 otherwise. Completing one session took participants between 14 and 49 minutes.

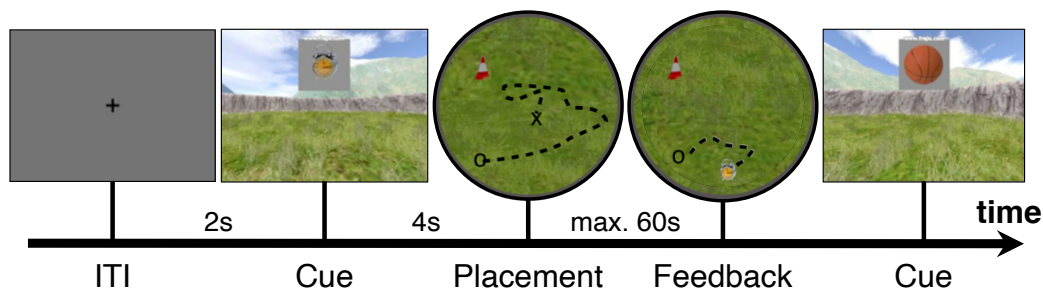

**Figure 1:** Task procedure during feedback phase. Each trial started with a fixation cross on a grey background for two seconds. Afterwards a cue was presented showing the object to which participants needed to navigate (object locations were learned during encoding phase). The participant then had 60 seconds to navigate from their starting location (cross) to the object location according to their spatial memory. Participants indicated that they had arrived at the remembered location (circle) by pressing a response button, after which the object appeared at its true location. Participants could observe the difference between their response and the correct location and were required to navigate towards and walk over the correct location, before the cue of the next trial was presented.

### 149 2.3 Drug administration

150 Following a double-blind drug administration design, participants were given either a total  
151 of 225mg of L-DOPA (Madopar, Roche, Levodopa/Benserazid, 4:1 ratio) or a placebo (P-  
152 Tabletten white 8mm Lichtenstein, Winthrop Arzneimittel) before each MRI session in the  
153 form of two orally administered dosages. A first dosage (150mg L-DOPA/Placebo) was  
154 given about 10 minutes before subjects entered the MRI scanner, roughly one hour before  
155 the spatial navigation task began. To assure high dopamine availability during the task,  
156 a second booster dosage (75mg L-DOPA/Placebo) was administered roughly ten minutes  
157 before task onset (cf. [Kroemer et al., 2019](#)). Participants were pseudo-randomly assigned to  
158 one of two groups with different session order, either the group that received L-DOPA in the  
159 first session and placebo in the second session (Drug-Placebo group, 40 subjects) or the group  
160 that started with the placebo in the first session (Placebo-Drug group, 44 participants).

### 161 2.4 Image acquisition

162 All data was collected on a 3 Tesla Siemens Magnetom Trio (Siemens, Erlangen, Germany)  
163 MRI scanner. T1-weighted structural images were collected at the beginning of the first  
164 session using a MP-RAGE pulse sequence ( $0.8 \times 0.8 \times 0.8 \text{ mm}$  voxels,  $TR = 2400 \text{ ms}$ ,  $TE =$

165 2.19 ms, TI = 1000 ms, acquisition matrix =  $320 \times 320 \times 240$ , FOV = 272 mm, flip angle =  
166  $8^\circ$ , bandwidth =  $210 \frac{\text{Hz}}{\text{Px}}$ ). At the beginning of the second session T2-weighted structural scan  
167 was collected ( $0.8 \times 0.8 \times 0.8$  mm voxels, TR = 3200 ms, TE = 565 ms, acquisition matrix =  
168  $350 \times 350 \times 2630$ , FOV = 272 mm, bandwidth =  $744 \frac{\text{Hz}}{\text{Px}}$ ).

169 Functional on-task data was collected using a T2\*-weighted echo-planar imaging (EPI)  
170 pulse sequence  $3 \times 3 \times 2.5$  mm voxels, slice thickness = 2.5 mm, distance factor = 20%,  
171 TR = 2360 ms, TE = 25 ms, image matrix =  $64 \times 64$ , FOV = 192 mm, flip angle =  $80^\circ$ ,  
172 48 axial slices, GRAPPA parallel imaging, acceleration factor: 2, interleaved acquisition). The  
173 sequence lasted until the task was completed and took about 15 – 50 minutes. Additional  
174 functional scans not analyzed in this manuscript included data from the transfer phase, data  
175 from a decision making task, as well as data from a resting state scan collected at the start  
176 of each session.

177 Quality of all collected functional sequences was assessed using MRI quality control  
178 (MRIQC; [Esteban et al., 2017](#)). The quality measure of framewise displacement (FD,  
179 threshold 3mm), a measure for movement during image acquisition ([Power et al., 2014](#)), was  
180 extracted and used for statistical control.

## 181 2.5 ROIs

182 Each ROI was created from anatomical labels obtained from Mindboggle’s FreeSurfer-based  
183 segmentation of each participant’s individual T1-weighted images ([Klein et al., 2017](#)). We  
184 investigated three predefined ROIs in light of previous findings indicating direction selective  
185 coding in these regions ([Taube, 2007](#); [Shine et al., 2016](#); [Flossmann & Rochefort, 2021](#);  
186 [Guitchounts et al., 2020](#); [Cacucci et al., 2004](#); [Koch et al., 2020](#)). An early visual cortex  
187 (EVC) ROI, consisting of the bilateral cortical masks of the cuneus, lateral occipital cortex,  
188 and the pericalcarine cortex. A ROI of the retrosplenial cortex (RSC) constructed from  
189 the bilateral, cortical masks of the cingulate isthmus. A mask of the hippocampus (HC)  
190 was extracted from the respective bilateral masks of the parcellation. In addition to these  
191 core masks, we added a ROI of the left motor cortex, constructed from the cortical mask of  
192 the left precentral gyrus, to serve as a control. Although our resolution was suboptimal to  
193 investigate small areas, we included a mask of the entorhinal cortex (EC) in order to explore



194 if direction signals could be found there as well.

## 195 **2.6 Image preprocessing**

196 **Copyright Waiver** Results included in this manuscript come from preprocessing per-  
197 formed using *fMRIPrep* 20.0.6 (Esteban, Markiewicz, et al., 2018; Esteban, Blair, et al.,  
198 2018; RRID:SCR\_016216), which is based on *Nipype* 1.4.2 (Gorgolewski et al., 2011, 2018;  
199 RRID:SCR\_002502). The boilerplate text in this section (2.6) was automatically generated  
200 by fMRIPrep with the express intention that users should copy and paste this text into their  
201 manuscripts *unchanged*. It is released under the [CC0](#) license.

202 **Anatomical data preprocessing** The T1-weighted (T1w) image was corrected for  
203 intensity non-uniformity (INU) with *N4BiasFieldCorrection* (Tustison et al., 2010), dis-  
204 tributed with ANTs 2.2.0 (Avants, Epstein, Grossman, & Gee, 2008; RRID:SCR\_004757),  
205 and used as T1w-reference throughout the workflow. The T1w-reference was then skull-  
206 stripped with a *Nipype* implementation of the `antsBrainExtraction.sh` workflow (from  
207 ANTs), using OASIS30ANTs as target template. Brain tissue segmentation of cerebrospinal  
208 fluid (CSF), white-matter (WM) and gray-matter (GM) was performed on the brain-extracted  
209 T1w using `fast` (FSL 5.0.9; RRID:SCR\_002823; Zhang, Brady, & Smith, 2001). Brain sur-  
210 faces were reconstructed using `recon-all` (FreeSurfer 6.0.1; RRID:SCR\_001847; Dale, Fis-  
211 chl, & Sereno, 1999), and the brain mask estimated previously was refined with a custom  
212 variation of the method to reconcile ANTs-derived and FreeSurfer-derived segmentations of  
213 the cortical gray-matter of Mindboggle (RRID:SCR\_002438; Klein et al., 2017). Volume-  
214 based spatial normalization to two standard spaces (MNI152Lin, MNI152NLin2009cAsym)  
215 was performed through nonlinear registration with `antsRegistration` (ANTs 2.2.0), using  
216 brain-extracted versions of both T1w reference and the T1w template. The following tem-  
217 plates were selected for spatial normalization: *Linear ICBM Average Brain (ICBM152)*  
218 *Stereotaxic Registration Model* (Mazziotta, Toga, Evans, Fox, & Lancaster, 1995; Tem-  
219 plateFlow ID: MNI152Lin), *ICBM 152 Nonlinear Asymmetrical template version 2009c*  
220 (Fonov, Evans, McKinstry, Almlí, & Collins, 2009; RRID:SCR\_008796; TemplateFlow ID:  
221 MNI152NLin2009cAsym).

222 **Functional data preprocessing** For each of the 4 BOLD runs collected per subject  
223 (two task related runs reported here and 2 resting state runs not reported here), the following  
224 preprocessing was performed. First, a reference volume and its skull-stripped version were  
225 generated using a custom methodology of *fMRIPrep*. Susceptibility distortion correction  
226 (SDC) was omitted. The BOLD reference was then co-registered to the T1w reference using  
227 **bbregister** (FreeSurfer) which implements boundary-based registration ([Greve & Fischl,](#)  
228 [2009](#)). Co-registration was configured with six degrees of freedom. Head-motion parameters  
229 with respect to the BOLD reference (transformation matrices, and six corresponding rotation  
230 and translation parameters) are estimated before any spatiotemporal filtering using **mcflirt**  
231 (FSL 5.0.9; [Jenkinson, Bannister, Brady, & Smith, 2002](#)). BOLD runs were slice-time cor-  
232 rected using **3dTshift** from AFNI 20160207 ([Cox & Hyde, 1997](#); RRID:SCR\_005927). The  
233 BOLD time-series were resampled onto the following surfaces (FreeSurfer reconstruction  
234 nomenclature): *fsnative*, *fsaverage*. The BOLD time-series (including slice-timing correction  
235 when applied) were resampled onto their original, native space by applying the transforms  
236 to correct for head-motion. These resampled BOLD time-series will be referred to as *pre-*  
237 *processed BOLD in original space*, or just *preprocessed BOLD*. The BOLD time-series were  
238 resampled into standard space, generating a *preprocessed BOLD run in MNI152Lin space*.  
239 The first step in this process was that a reference volume and its skull-stripped version  
240 were generated using a custom methodology of *fMRIPrep*. Several confounding time-series  
241 were calculated based on the *preprocessed BOLD*: framewise displacement (FD), DVARS  
242 and three region-wise global signals. FD and DVARS are calculated for each functional run,  
243 both using their implementations in *Nipype* (following the definitions by [Power et al., 2014](#)).  
244 The three global signals are extracted within the CSF, the WM, and the whole-brain masks.  
245 Additionally, a set of physiological regressors were extracted to allow for component-based  
246 noise correction (*CompCor*; [Behzadi, Restom, Liau, & Liu, 2007](#)). Principal components are  
247 estimated after high-pass filtering the *preprocessed BOLD* time-series (using a discrete cosine  
248 filter with 128s cut-off) for the two *CompCor* variants: temporal (tCompCor) and anatomical  
249 (aCompCor). tCompCor components are then calculated from the top 5% variable voxels  
250 within a mask covering the subcortical regions. This subcortical mask is obtained by heavily  
251 eroding the brain mask, which ensures it does not include cortical GM regions. For aComp-

252 Cor, components are calculated within the intersection of the aforementioned mask and the  
253 union of CSF and WM masks calculated in T1w space, after their projection to the native  
254 space of each functional run (using the inverse BOLD-to-T1w transformation). Components  
255 are also calculated separately within the WM and CSF masks. For each CompCor decompo-  
256 sition, the  $k$  components with the largest singular values are retained, such that the retained  
257 components' time series are sufficient to explain 50 percent of variance across the nuisance  
258 mask (CSF, WM, combined, or temporal). The remaining components are dropped from  
259 consideration. The head-motion estimates calculated in the correction step were also placed  
260 within the corresponding confounds file. The confound time series derived from head motion  
261 estimates and global signals were expanded with the inclusion of temporal derivatives and  
262 quadratic terms for each (Satterthwaite et al., 2013). Frames that exceeded a threshold of 0.5  
263 mm FD or 1.5 standardised DVARS were annotated as motion outliers. All resamplings can  
264 be performed with *a single interpolation step* by composing all the pertinent transformations  
265 (i.e. head-motion transform matrices, susceptibility distortion correction when available, and  
266 co-registrations to anatomical and output spaces). Gridded (volumetric) resamplings were  
267 performed using `antsApplyTransforms` (ANTs), configured with Lanczos interpolation to  
268 minimize the smoothing effects of other kernels (Lanczos, 1964). Non-gridded (surface) re-  
269 samplings were performed using `mri_vol2surf` (FreeSurfer).

270 Many internal operations of *fMRIPrep* use *Nilearn* 0.6.2 (RRID:SCR\_001362; Abraham  
271 et al., 2014), mostly within the functional processing workflow. For more details of the  
272 pipeline, see [the section corresponding to workflows in fMRIPrep's documentation](#).

## 273 2.7 fMRI analyses

274 **Classification of walking direction** All classification of walking direction was per-  
275 formed in Python (Python Software Foundation; Python Language Reference, version 3.7.8;  
276 available at <http://www.python.org>) and relied on `scikit-learn` (Pedregosa et al., 2011)  
277 and `nilearn` (Abraham et al., 2014). Statistical analysis was performed using R (version  
278 4.0.3, R Core Team, 2021) and the packages `lme4` (Bates, Mächler, Bolker, & Walker, 2015)  
279 and `emmeans` (Lenth, 2021). All statistical figures were created using the `ggplot2` package  
280 (Wickham, 2016).

281 Functional data was prepared for classification by smoothing images with a 3mm FWHM  
282 kernel. Next, `nilearn`'s `signal.clean` function was used to detrend, high-pass filter ( $\frac{1}{128}$  Hz),  
283 de-noise (using 10 components of aCompCor) and z-standardize the time courses.

284 Participants' walking direction was extracted from navigated paths within the virtual  
285 environment. The complete 360°-space of direction was binned into six equally spaced bins of  
286 60°. Classifier training examples were then constructed by taking fMRI multi-voxel patterns  
287 in response to consistent walking within one binned direction for at least one second. Hence  
288 the number of classifier examples for each participant and direction were dependent on the  
289 travelled paths and the number of direction changes. If the same example spanned multiple  
290 TRs (i.e., was longer than 2.36s) all TRs spanned were averaged to assure a single voxel-  
291 pattern per example. Voxel responses were taken two TRs (4.72s) after the event to adjust  
292 for hemodynamic lag. A multinomial logistic regression classifier (L2 regularization,  $C = 1$ ,  
293 tolerance =  $10^{-4}$ , 1000 maximum iterations; as implemented in `scikit-learn`) was applied  
294 to the resulting activation patterns in order to test whether walking direction could be  
295 classified. Two cross-validation approaches were used for classification: cross-session and  
296 within-session. Cross-session decoding was used to assess overall decoding, irrespective of  
297 drug intervention. Within-session decoding was used to separately assess decoding in the  
298 L-DOPA and placebo sessions. Results for both approaches are reported separately.

299 For cross-session cross-validation, in order to reduce auto-correlation of noise, the data  
300 of each session was first split into two sets, one consisting of odd and one of even walking  
301 direction events. Cross validation approaches as described below were then performed sep-  
302 arately for each split. This approach ensured that walking direction events within each of  
303 the sets had a higher temporal separation (average: 8.31 seconds, median of 5.70 seconds)  
304 as compared to the original data. In consequence, auto-correlation of noise between consec-  
305 utive examples was reduced, resulting in classifiers that were less biased by autocorrelated  
306 event structure (for details, see [Koch et al., 2020](#)). Each set was further split into four folds  
307 for cross-validation purposes. Specifically, each of the two sessions was split once such that  
308 both resulting folds contained the same amount of examples. Separate leave-one-fold-out  
309 classification analyses were then performed within each of the two sets (odd/even). The test  
310 set, as opposed to the training set, included odd as well as even examples to maximize the

311 number of predictions. Cross-validated decoding results from both sets were combined only  
312 afterwards.

313 Because session was associated with intervention type (placebo or L-DOPA), we also  
314 adopted a within-session approach for cross-validation. Specifically, cross-session cross-  
315 validation was problematic in two ways: First, it could not be used to assess intervention  
316 effects that may differ between sessions. Second, training on data from a DA session and  
317 testing on a Placebo session (and vice versa) would risk that DA induced changes in direction  
318 specific activation patterns could result in reduced classification. To address these issues,  
319 data from one session was separated into three folds, and cross-validated decoding was per-  
320 formed across these folds from the same session. An equal number of events per direction in  
321 each fold was ensured as above. The separation into odd and even events was dropped due  
322 to reduced data amount when considering only one session. Nevertheless, four participants  
323 (2 OA, 2 YA) had to be excluded for missing examples of at least one class in any of the two  
324 sessions, leaving a final sample of 80 participants (37 OA, 43 YA).

325 In both cross-validation approaches, we ensured a balanced number of training examples  
326 for each class by upsampling underrepresented classes if necessary. Trained classifiers were  
327 then used to predict the walking direction from examples in a testing set given by the remain-  
328 ing fold. A balanced accuracy score was calculated for each test set and results were pooled  
329 across all cross-validation runs. The resulting score was compared to a permutation distri-  
330 bution resulting from repeating the same classification 1000 times with randomly permuted  
331 class labels in the training set. Additionally, a linear mixed model (LMM) of classification  
332 accuracy with fixed effects of age group and ROI, and a random effect of participant was used  
333 to assess possible group- or ROI-based differences, as well as their interaction. The model  
334 for session-specific decoding results included main- and interaction effects of intervention  
335 (L-DOPA vs. Placebo), age group (OA vs. YA), ROI, and session order (L-DOPA – Placebo  
336 vs. Placebo – L-DOPA; to allow assessing order effects of the drug intervention). To assess  
337 whether drug effects scaled with the administered drug dosage relative to body weight the  
338 model also included a relative dosage/kg  $\times$  intervention interaction. Additionally, in both  
339 models main effects of FD and an FD  $\times$  intervention interaction were included in the model  
340 as a nuisance variable to capture possible effects of drug-related head motion. Random ef-

341 facts included a random intercept of participant and a random slope of intervention to assure  
342 a within-subject comparison of decoding accuracy in both sessions.

343 **Influence of spatial angular difference on fMRI pattern similarity** To test  
344 if neural representations of walking direction show the same circular similarity structure as  
345 directions in geometrical space, we analysed the structure of classifiers predictions as in [Koch](#)  
346 [et al. \(2020\)](#). If the similarity of two fMRI patterns of two different directions is associated  
347 with their angular distance in space, this should be reflected in the probability distributions  
348 over all possible directions. Specifically, we extracted the probability estimates of each of the  
349 six classes for each example of the testing set as calculated by the logistic regression classifier.  
350 These estimates were aligned with regard to relative angular difference from the target class  
351 ( $-120^\circ$ ,  $-60^\circ$ ,  $0^\circ$ ,  $60^\circ$ ,  $120^\circ$ ,  $180^\circ$ ) and then averaged over all examples, resulting in a single  
352 curve for each participant which we refer to as the *confusion function*. Two simple models  
353 of the confusion function with one parameter each were compared: A Gaussian curve in the  
354 form of

$$g(x) = \frac{1}{Z} e^{-\frac{1}{2}\tau x^2}, \quad (1)$$

355 where  $x$  denotes the angular difference and  $\tau$  the precision (the inverse of the variance,  $\frac{1}{\sigma^2}$ ).  
356 Furthermore,  $Z$  normalizes the curve. This model captures an inverse relationship between  
357 the angular difference of two walking directions and the confusability of their associated  
358 neural patterns. An alternative model expressing an absence of such relationship is described  
359 by a uniform distribution of classification errors over the remaining five off-center bins. This  
360 model could still accommodate high classification for the target class, but would assume that  
361 the probabilities of other classes are flat, i.e unrelated to the distance from the target class.  
362 Such a model is given by

$$u(x) = \begin{cases} a, & \text{if } x = 0 \\ \frac{100-a}{5}, & \text{otherwise} \end{cases} \quad (2)$$

363 where  $a$  denotes the classification accuracy. Models were fitted separately within each par-  
364 ticipant and ROI. Because both models had only one free parameter ( $\tau$  and  $a$ , respectively),  
365 we compared the square root of the mean squared errors (RMSE) between off-center model

366 predictions for both models directly. A better model fit of the Gaussian model indicates  
367 directional tuning, i.e. an inverse relationship between the angular difference of directions  
368 and the similarity of their neural representations.

369 In addition to comparing model fits, the Gaussian model allowed us to assess age-  
370 differences in directional tuning specificity, which were captured by the precision parameter  
371  $\tau$ . A LMM identical to the one modelling classification accuracy described in the previous  
372 section was used to analyze differences in precision.

## 373 2.8 Behavioral analysis

374 Task performance during the feedback phase was measured by the distance error: the Eu-  
375 clidean distance between the true location of an object and the location the participant  
376 placed the respective object (measured in virtual meters; vm; 1vm = 62.5 Unreal units).  
377 Performance for each trial was given by the average distance error across all five presented  
378 objects within a trial (missing responses due to exceeding the time limit were excluded).  
379 Kolmogorov–Smirnov tests indicated that performance scores of YA were not normally dis-  
380 tributed ( $D = .169$ ,  $p = .010$ ,  $D = .064$ ,  $p = .881$ , for YA and OA, respectively; tested  
381 for performance on the last trial). To assure normality, the average distance errors in each  
382 trial were log-transformed ( $D = .054$ ,  $p = .941$ ,  $D = .106$ ,  $p = .323$  after transform for  
383 YA and OA, respectively). To assess the process of learning during the feedback phase of  
384 the task, we compared the difference between the first and last trial. Note that in light of  
385 non-linear learning curves we did not use a linear model across all trials on purpose. The dif-  
386 ference between the two log-transformed measures was modeled using an LMM including the  
387 fixed effects of intervention (L-DOPA vs. Placebo), age group, and session order (L-DOPA–  
388 Placebo vs. Placebo–L-DOPA) as well as a random intercept of participant. Additionally,  
389 we compared performance after learning (last trial) with an identical LMM. Furthermore,  
390 group-level performance was compared to chance given by the average distance error as-  
391 suming random responses for every object. To this end, we uniformly sampled  $10^5$  possible  
392 locations within the circular arena. The task was then simulated 1000 times while each  
393 response of each participant was randomly drawn from the pool of possible locations. This  
394 yielded a distribution of 1000 group-means assuming random performance over a given trial

395 and allowed a comparison of trial-specific group-means

396 Finally, we aimed to quantify the relationship between the specificity of direction signals  
397 and task performance to see if more specific direction signals allow better performance on  
398 the given task. To this end, we used previous LMMs of classification accuracy but added the  
399 regressor of performance in the last trial of the experiment. To assure normally distributed  
400 values the log-transformed performance variable was used. Furthermore, performance values  
401 were demeaned to eliminate a possible confound between age group and task performance.  
402 The FD-related nuisance regressors as well as the interaction between dosage per body weight  
403 and intervention were dropped from the model. To see if L-DOPA enhanced signal specificity  
404 in proportion to its enhancement of task performance the above model was adapted to predict  
405 the difference between sessions in classification accuracy (L-DOPA - Placebo). The increase  
406 in task performance was given by the session difference (L-DOPA - Placebo) of the log-  
407 transformed performance in the last trial of the task.

## 408 **3 Results**

### 409 **3.1 Behavioral results**

410 Log-transformed average distance errors on each trial for both age groups and interventions  
411 (L-DOPA vs. placebo) are displayed in Fig. 2. We first investigated log transformed distance  
412 errors on the last trial after learning, using a linear mixed model with fixed effects of interest  
413 for intervention and age group and a random effect of participant.

414 The LMM showed a significant main effect of age group ( $\chi^2(1) = 167.010$ ,  $p > .001$ , the  
415  $\chi^2$  reflect likelihood ratio tests, see Methods). Post-hoc tests showed that OA had higher  
416 distance errors compared to YA at the end of learning ( $t(80) = 12.811$ ,  $p < .001$ ). The  
417 model did not display any significant main effect of intervention ( $\chi^2(1) = 1.479$ ,  $p = .224$ )  
418 or intervention by age interaction.

419 Next, we investigated performance increases, i.e. log distance errors on the first minus  
420 the last trial. Again, a LMM revealed a significant main effect of age group ( $\chi^2(1) = 61.054$ ,  
421  $p > .001$ ), but no main effect of intervention or intervention  $\times$  age interaction.

422 Investigating the nuisance variable of session order revealed no main effects in either



423 end-of-learning performance ( $\chi^2(1) = 0.1784, p = .673$ ) or in performance changes ( $\chi^2(1) =$   
424  $0.948, p = .330$ ). No session order  $\times$  intervention effect was found for performance changes.  
425 Unexpectedly, we found a significant interaction of intervention  $\times$  session order in end-of-  
426 learning performance ( $\chi^2(1) = 13.744, p < .001$ ), reflecting a trend for a positive effect of  
427 DA if L-DOPA was given in the second session ( $t(80) = -1.693, p = .094$ ), while this was  
428 reversed if L-DOPA was given in the first session ( $t(80) = 3.368, p = .001$ ).

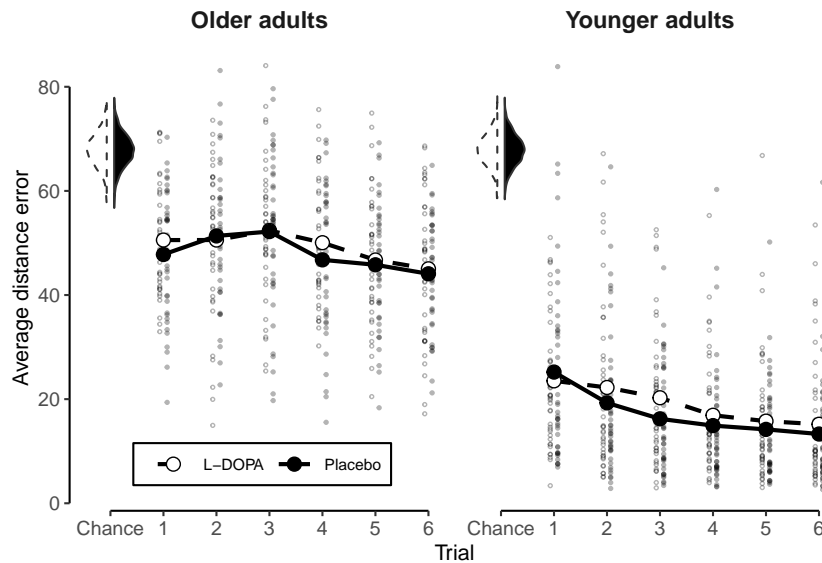

**Figure 2:** Behavioral results. Average error in object placement for all six trials for OA and YA. Error was measured as the Euclidean distance in vm between the true location of an object and the participants' placement. Reduction in error shows better task performance. All values of the placebo session depicted in black, all values of the L-DOPA session depicted in white. Small dots indicate individual values of participants. Average over participants in each trial shown by the large dots. Shown on the upper left are session-specific distributions of  $10^3$  average performance values in a trial assuming random placement of objects. Note that, in turn, only the trial averages (large dots) can be compared to this chance-distribution.

### 429 3.2 Decodability of walking direction

430 We first assessed decoding using a cross-validation approach across intervention sessions  
431 (see Methods). In line with previous work (Koch et al., 2020), walking direction could be  
432 decoded in the EVC ( $p < .001$ ) and RSC ( $p = .040$ ), but not in the left motor cortex  
433 ( $p = .255$ ), entorhinal cortex ( $p > .999$ ) and HC ( $p > .999$ ), compared to a permutation test  
434 (Bonferroni corrected for five comparisons, one sided). A LMM of classification accuracy  
435 with fixed effects of interest for age group and ROI, and a random effect of participant  
436 revealed a significant main effect of age group ( $\chi^2(1) = 16.209, p < .001$ ), a main effect  
437 of ROI ( $\chi^2(4) = 194.810, p < .001$ ), and a ROI  $\times$  age group interaction ( $\chi^2(4) = 37.851,$

438  $p > .001$ ). Post-hoc mean comparisons showed significantly higher classification accuracy in  
439 YA in the EVC ( $t(320) = -7.280, p < .001$ ), but no such age-related effects in the RSC or  
440 HC ( $t(320) \geq -1.489, p \geq .138$ ), see Fig. 3A. Although classification accuracy was higher in  
441 YA in the EVC, a permutation test revealed significant above-chance decoding also in OA  
442 ( $p < .001$ ). No main effect of the nuisance variable FD was found ( $\chi^2(1) = .482, p > .487$ ).

443 Investigating the predicted probabilities by the logistic regression directly, rather than the  
444 percent of correctly predicted events, revealed a peak at the true direction and decreasing  
445 probabilities for the off-target directions in RSC and EVC, as expected (see Fig. 3B).  
446 Notably, in this more sensitive analysis also the HC exhibited an above-chance probability  
447 of the target direction ( $t(83) = 5.346, p < .001, \text{corr.}$ ).

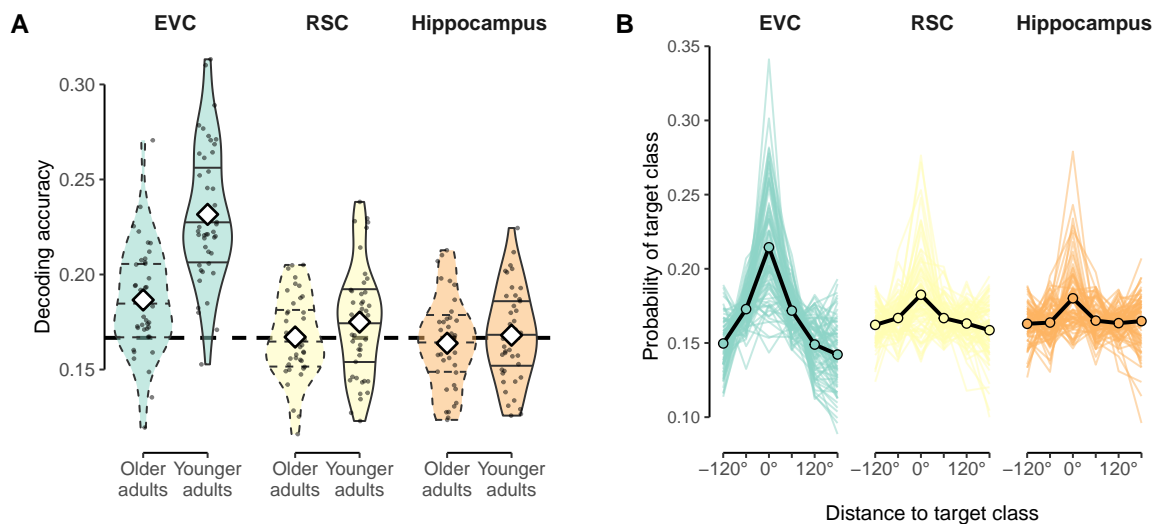

**Figure 3:** Cross-intervention walking direction decoding. **A:** Cross-validated decoding accuracy of walking direction within both age groups for the cross-session approach, in which the classifier was partially trained on the placebo session and tested on the DA session, or vice versa. Results are shown separately for EVC (green), RSC (yellow), and hippocampus (orange) and each age group (dashed/solid lines). Violin plots indicate distributions, dots represent individual participants and white diamonds mean accuracy. Horizontal, dashed line indicates chance level. **B:** Confusion function for each classifier. Depicted are class probabilities of the logistic classifier as a function of angular distance from the target class. Colored lines indicate individual participants, black lines the group average. Colors as in A.

### 448 3.3 Influence of L-DOPA intervention on decodability

449 Decoding analyses reported above combined data across sessions/interventions and thus can-  
450 not be used to examine the effects of intervention type. We therefore used a within-session  
451 decoding analysis to investigate the influence of L-DOPA administration on the decodabil-  
452 ity of walking direction (see Methods). A LMM of classification accuracy indeed showed a

453 significant main effect of L-DOPA intervention ( $\chi^2(1) = 6.796, p = .009$ ), which indicated  
454 higher decoding in L-DOPA compared to placebo sessions. As before, we also found main ef-  
455 fects of ROI ( $\chi^2(4) = 271.674, p < .001$ ), but no L-DOPA  $\times$  ROI interaction ( $\chi^2(4) = 3.847,$   
456  $p = .427$ ). Despite the lack of an interaction, post-hoc tests revealed that significantly higher  
457 decoding accuracy in the drug compared to the placebo condition was most apparent in the  
458 HC ( $t(603) = 2.153, p = .032$ ) and trending in the RSC ( $t(603) = 1.916, p = .055$ ), while no  
459 comparable effects were found in the EVC ( $t(603) = 1.447, p = .148$ ). Results are displayed  
460 in Fig. 4A.

461 In addition, we also found a main effect of age group ( $\chi^2(1) = 6.273, p = .012$ ) and a  
462 age group  $\times$  ROI interaction ( $\chi^2(4) = 60.970, p < .001$ ). We will elucidate these age effects  
463 further below, using separate LMMs per ROI. None of the included nuisance regressors of  
464 FD ( $\chi^2(1) = 3.064, p = .080$ ) or an interaction between FD and intervention ( $\chi^2(1) = .048,$   
465  $p = .826$ ) showed a significant effect on decodability of walking direction. The same was true  
466 for any effects of session order ( $\chi^2(1) = .083, p = .774$ ). There was no significant interaction  
467 between the intervention and the administered dosage per body weight ( $\chi^2(2) = .286, p =$   
468  $.867$ ).

469 To further specify the region-specific effects of DA, LMMs were run separately for each  
470 ROI. These ROI-specific LMMs reproduced the main effects of intervention within the HC  
471 ( $\chi^2(1) = 5.263, p = .022$ ) and the RSC ( $\chi^2(1) = 4.868, p = .027$ ). In addition, we found  
472 an intervention  $\times$  age group interaction within the RSC ( $\chi^2(1) = 3.877, p = .049$ ), but no  
473 such interaction in HC ( $\chi^2(1) = 1.518, p = .218$ ). Post-hoc comparisons showed that the  
474 effect in RSC was driven by higher decodability of walking direction in the DA compared to  
475 placebo session in young adults ( $t(75.6) = 2.879, p = .005$ ), but not in OA ( $t(75.4) = -.161,$   
476  $p = .872$ ). Within the EVC, only a main effect of age group ( $\chi^2(1) = 16.350, p < .001$ ), but  
477 no effect of DA intervention ( $\chi^2(1) = 2.038, p = .153$ ) was found.

478 Fig. 4B shows the increase in decodability of walking direction in the L-DOPA condition  
479 for the HC and RSC, respectively for each age group. Note that the random slope of inter-  
480 vention had to be dropped from these models to avoid having the same number of random  
481 effects as there are data points.

482 Investigating nuisance variables, we found no impact of dosage per body weight on the

483 intervention effect in any ROI ( $\chi^2(2) < 3.578$ ,  $p \geq .167$ , for the interaction). Investigating  
 484 the movement related variable FD, we found no significant main effects of FD ( $\chi^2(1) \leq 1.448$ ,  
 485  $p \geq .229$ ) or an interaction between FD and intervention ( $\chi^2(1) \leq .644$ ,  $p \geq .422$ ) in HC  
 486 or RSC. A significant main effect of FD was found in the EVC, however ( $\chi^2(1) = 4.935$ ,  
 487  $p = .026$ ). This reflected worse classification accuracy with higher movement during image  
 488 acquisition (linear regression relating classification accuracy to FD:  $b = -.118$ ,  $t(158) =$   
 489  $-6.302$ ,  $p < .001$ ).

490 A final control analysis within the left motor cortex did neither identify a main effect of  
 491 intervention ( $\chi^2(1) = .027$ ,  $p = .869$ ) nor any other main effects. Post-hoc tests confirmed  
 492 that direction decodability under L-DOPA was not significantly different from decodability  
 493 under placebo, regardless of session order ( $t(74.9) = -1.519$ ,  $p = .133$ , and  $t(74.1) = 1.202$ ,  
 494  $p = .233$ , L-DOPA–Placebo and Placebo–L-DOPA, respectively).

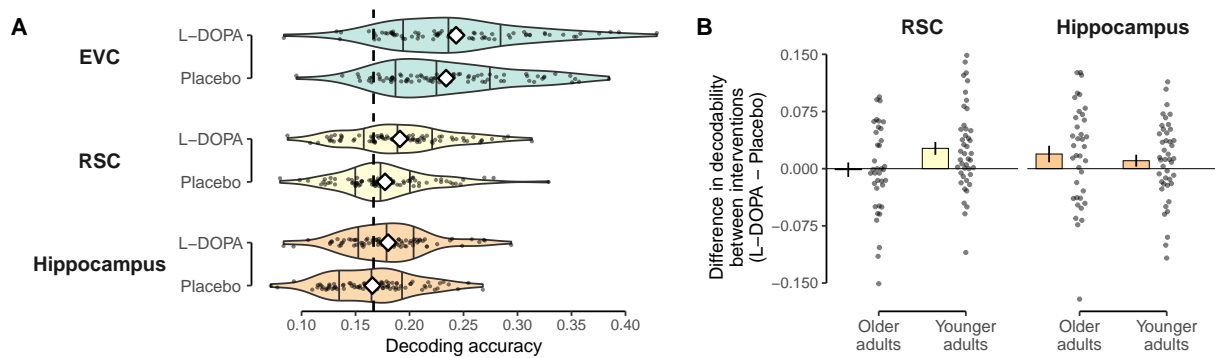

**Figure 4:** Effect of L-DOPA on decoding of neural walking direction signals. **A:** Intervention-specific decodability of walking direction within each ROI. Black dots show values of participants and violin plots depict intervention-specific distribution. Means are represented by white diamonds. Chance-level is shown by dashed line and based on the total number of classes (6 classes, 16.6% chance). **B:** Influence of drug intervention on decodability (L-DOPA – Placebo) shown for the RSC and hippocampus and split by age groups. Values higher than zero indicate higher decoding accuracy in the L-DOPA condition. Bars reflect group means and error bars reflect SEM. Black dots show individual values of each participant.

### 495 3.4 Influence of L-DOPA intervention on tuning specificity

496 We next investigated tuning width. Omnibus analyses across ROIs revealed no L-DOPA  
 497 effect, a main effect of ROI ( $\chi^2(2) = 281.509$ ,  $p < .001$ ), and results otherwise consistent  
 498 with those reported below. We therefore immediately report results of ROI-specific LMMs.  
 499 A model of EVC tuning width found no main effect of intervention or intervention  $\times$  age  
 500 effect was found in EVC. We did find a significant main effect of age group ( $\chi^2(1) = 20.631$ ,

501  $p < .001$ ), reflecting lower precision of the fitted Gaussian curves in OA compared to YA  
502 ( $t(79.7) = -4.533, p < .001$ ). The same analyses in RSC an HC showed no significant main  
503 effects of intervention, age, or intervention  $\times$  age interactions.

504 No nuisance effect of FD or FD  $\times$  intervention interaction were found in any ROI-specific  
505 model ( $\chi^2(1) \leq .857, p \geq .355$  and  $\chi^2(1) \leq .578, p \geq .447$ , respectively) just as there were  
506 no main effects of session order ( $\chi^2(1) \leq .257, p \geq .612$ ) Additionally, intervention was  
507 not involved in any interaction with dosage per body weight ( $\chi^2(2) \leq 4.412, p \geq .110$ ).  
508 Unexpectedly, however, we found a significant intervention  $\times$  session order interaction in  
509 the EVC ( $\chi^2(1) = 10.713, p < .001$ ; see Fig. 5A), suggesting that tuning precision was  
510 higher when L-DOPA was administered in the second session ( $t(74.0) = 2.911, p < .005$ )  
511 compared to when it was administered in the first session ( $t(75.2) = -1.607, p = .112$ ). No  
512 intervention  $\times$  session order interaction was found in any other ROI. An exploratory follow  
513 up of three-way interactions found a intervention  $\times$  age group  $\times$  session order effect in the  
514 RSC ( $\chi^2(1) = 6.626, p = .010$ ), which pointed towards L-DOPA effects only when given in  
515 the second session, and only in YA ( $t(74.6) = 2.818, p = .006$ ).

516 The means of the fitted Gaussian curves in the L-DOPA condition are shown in Fig.  
517 5B. Please note that the interpretability of these results is limited since a model comparison  
518 between a Gaussian and uniform model of the confusion function remained inconclusive  
519 towards either model in both, the drug and placebo condition ( $t(79) \leq 1.749$  or  $t(79) \geq$   
520  $-1.921$ , all  $p \geq .350$ , corr.).

### 521 **3.5 Relations between task performance, L-DOPA and direction** 522 **decoding**

523 Finally, we asked whether task performance (spatial distance error) was related to neural  
524 direction encoding as well as to the effects of L-DOPA on these neural signals. We therefore  
525 investigated the link between session-specific decoding accuracy and task performance on  
526 the last trial, in addition to age group, intervention and session order. Because performance  
527 on the last trial was highly confounded with age group (see 2) performance values were  
528 demeaned within each age group to investigate effects unrelated to age-specific performance  
529 differences.

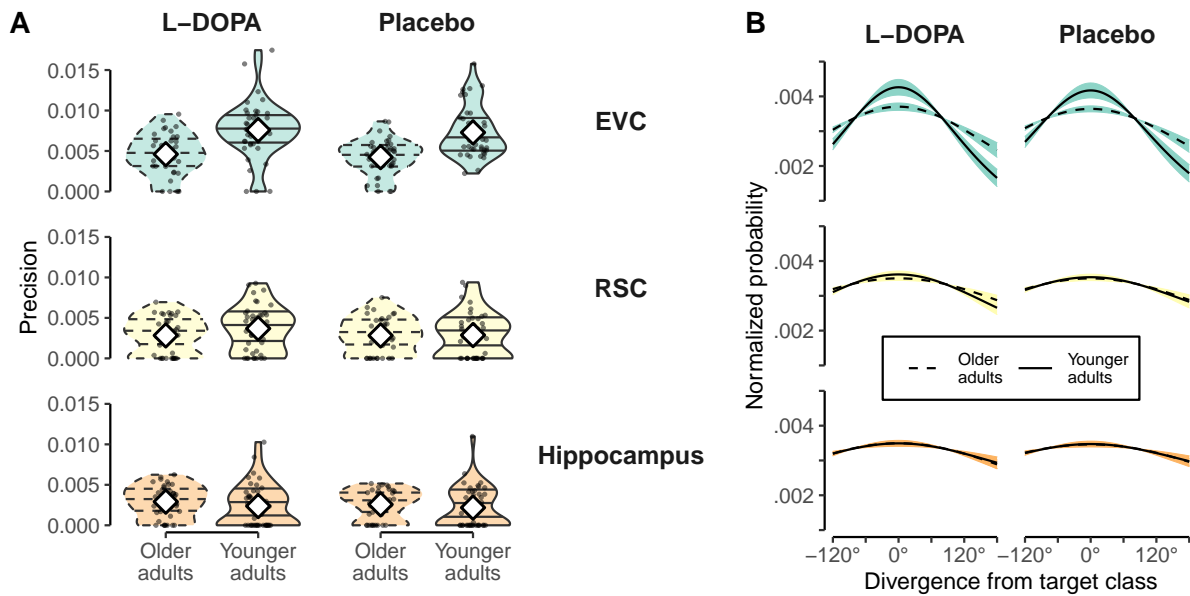

**Figure 5:** Effect of L-DOPA on tuning specificity. **A:** Precision of Gaussian curves fitted to individual confusion functions in both age groups. Shown separately for the L-DOPA and Placebo intervention in the EVC, RSC, and Hippocampus. Black dots show values of individual participants. Intervention-specific distributions are shown by violin plots. White diamonds depict means. Plots of OA shown in dashed lines for easier distinction. **B:** Mean Gaussian tuning curves shown separately for age groups and intervention (L-DOPA vs. Placebo). ROI separation identical to that of panel A. OA are depicted with dashed lines. Shaded area represents SEM and is colored according to ROI. For each participant a Gaussian curve was fitted to the individual confusion function (given by the classifier). The shown mean Gaussian curves were obtained by averaging participants' individual Gaussian curves.

530            No effects related to task performance were found in the RSC or the HC ( $p \geq .053$ ). A  
531            model within the EVC revealed a significant main effect of distance error on the last trial on  
532            direction decoding ( $\chi^2(1) = 7.594, p = .006$ ; see Fig. 6A), pointing towards better decoding  
533            accuracy with better task performance ( $b = .040$ ). Besides the main effect, task performance  
534            in the EVC also interacted with age group ( $\chi^2(1) = 3.921, p = .048$ ), reflecting that the  
535            above mentioned relationship was present in YA ( $F(1, 111.03) = 11.912, p < .001, b = .033$ )  
536            and absent in OA ( $F(1, 121.83) = .066, p = .798, b = .006$ ). While there was no main  
537            effect of session order ( $\chi^2(1) = .009, p = .922$ ), the model furthermore indicated a separate  
538            interaction between task performance and session order ( $\chi^2(1) = 4.332, p = .037$ ). A post-  
539            hoc test revealed a trend towards differing slopes depending if L-DOPA was given in the  
540            first or second session ( $t(132) = 1.904, p = .059$ ) but separate tests within each session order  
541            did not display any significant relationships between performance and classification accuracy  
542            ( $F(1, 143.83) = .607, p = .437, F(1, 118.80) = 3.164, p = .078$ , for L-DOPA – Placebo and  
543            Placebo – L-DOPA, respectively). As expected the model of EVC decoding accuracy also  
544            displayed a main effect of age group ( $\chi^2(1) = 40.244, p < .001$ ; see results for influence of

545 DA on decoding accuracy).

546 We next investigated change-change relations, asking whether L-DOPA-related changes  
547 in decoding were related to L-DOPA-related changes in task performance (see Fig. 6B).  
548 Linear regressions revealed that in YA L-DOPA-related changes in direction decoding in EVC  
549 were indeed positively related to changes in task performance ( $F(1, 72) = 6.730, p = .011,$   
550  $b = -.053$ , negative slopes since performance increase means less errors). In OA this was  
551 not the case ( $F(1, 72) = .049, p = .826, b = .006$ ). Linear models within the RSC and HC  
552 did not show any significant effects in change-change relations.

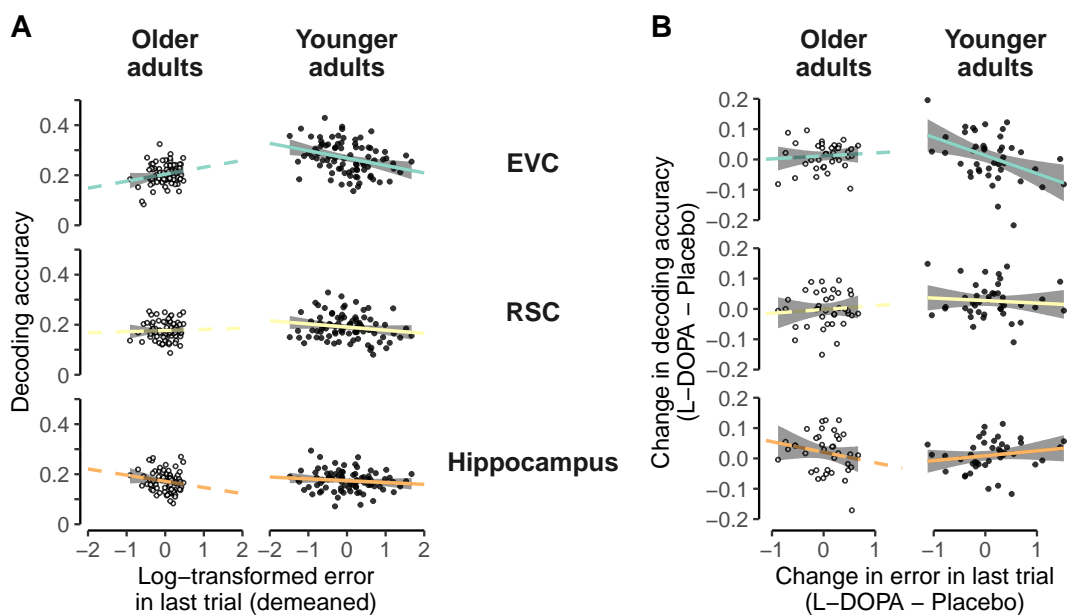

**Figure 6:** Relationship between decoding accuracy and behavioral performance. **A:** Relationship between decoding accuracy and log-transformed and demeaned distance errors. Shown for the EVC, RSC, and hippocampus separately for both age groups. Dots represent individual participants where OA are shown in white. Lines represent linear models of represented subset and are colored according to the ROI and shown in dashed for OA. **B:** Drug-related change-change relationship between decoding accuracy and behavioral performance. Axes show influence of L-DOPA administration by showing the difference in values between the L-DOPA session and placebo session. Depiction accordingly to A. Please note that in both, A and B, the slope lines were extended beyond the data points purely to aid visibility.

## 553 4 Discussion

554 In this work we tested the impact of L-DOPA on neural representations of walking direction  
555 in younger and older adults, using a double-blind, cross-over intervention design. In addition  
556 to a classic decoding approach, we assessed direction specificity of neural signals, a proxy  
557 for tuning functions, using the relative structure of classifier probability estimates. Our

558 results revealed that decodability of walking direction signals in the hippocampus and the  
559 retrosplenial cortex was enhanced following the administration of L-DOPA. L-DOPA had  
560 comparable effects on HC walking direction signals in both age groups, but in the RSC these  
561 DA effects were present only in YA. No L-DOPA effects were found in visual cortex (EVC).  
562 Yet, behavioral investigations showed that in younger adults, EVC direction decoding was  
563 related to task performance (spatial distance error), and that L-DOPA related changes in  
564 EVC decoding were related to changes in task performance. An investigation of tuning  
565 specificity revealed no main effects of L-DOPA or L-DOPA  $\times$  age group interactions.

566 Furthermore, decoding across interventions, we found evidence for stable direction sig-  
567 nals in EVC and RSC, and so some extent also in HPC. Investigating age group differences,  
568 we found higher classification accuracy and precision of tuning functions in the EVC of YA  
569 compared to OA, a sign of neural dedifferentiation. No age effects on decoding in the HPC  
570 or RSC were found. These results confirm our previous finding that neural representations  
571 of walking direction can be found in EVC and RSC, and that strong age-related differenti-  
572 ation is present particularly in EVC (Koch et al., 2020). We also showed that better EVC  
573 classification accuracy was related to better performance on task, suggesting an important  
574 functional role of this area in our task.

575 Importantly, our results also offer a number of novel insights. First, we show a causal  
576 influence of L-DOPA on how walking directions are encoded in the brain, in particular in the  
577 HC and the RSC. Both areas have been linked to directional and other spatial information  
578 (Spiers & Barry, 2015; Shine et al., 2016; Burles, Slone, & Iaria, 2017), and have even been  
579 shown to be part of the same dorsal pathway involved in visuospatial processing (Kravitz,  
580 Saleem, Baker, & Mishkin, 2011). Additionally, both areas display dopaminergic innervation  
581 (Berger, Verney, Alvarez, Vigny, & Helle, 1985; McNamara & Dupret, 2017), and previous  
582 reports have linked DA and spatial cognition more generally (Granado et al., 2008; El-Ghundi  
583 et al., 1999; Thurm et al., 2016). Second, the positive effects of DA on decoding are in line  
584 with computational models and empirical findings which suggest that DA affects neuronal  
585 gain (Li & Rieckmann, 2014; Cohen & Servan-Schreiber, 1992; Thurley, Senn, & Lüscher,  
586 2008). Accordingly, DA's influence on neural gain could lead to a stronger separation between  
587 signal and noise, which made different stimuli more specific and easier to distinguish for the



588 classifier. It should be noted, however, that we did not find any direct effects of L-DOPA on  
589 neural direction tuning specificity, which measures how similar neural patterns are to similar  
590 directions. Given the effects of DA on neural gain, we had hypothesized that this measure  
591 could be more sensitive to the effects of our intervention, but this was not the case. One  
592 possible explanation is that our design lacked the power to fully capture the neural tuning  
593 functions within just one session. Tentative analyses of EVC and RSC tuning specificity  
594 did show DA-related enhancement only in participants who received L-DOPA in the second  
595 session. We will discuss these session-specific effects further below.

596 Third, our study was set up to ask whether the L-DOPA intervention might reduce age-  
597 related neural dedifferentiation. Virtual walking direction offered a promising window to  
598 answer these questions since it has previously been shown to be subject to age-related neural  
599 dedifferentiation ([Koch et al., 2020](#)) and the broader domain of spatial cognition has been  
600 shown to be highly age-sensitive ([Wolbers et al., 2014](#); [Lester et al., 2017](#)). Age is also known  
601 to cause substantial loss of DA functioning (e.g. [Bäckman et al., 2006](#)), and we speculated  
602 that a lower baseline DA availability might magnify the effects of L-DOPA. Surprisingly, we  
603 did not find that the effects of L-DOPA were particularly pronounced in OA. Rather, the HC  
604 showed age-equivalent effects, and decoding in RSC was in fact enhanced only in YA. Other  
605 than individual differences in baseline DA level, task demand may also affect the inverted-U  
606 function of DA modulation ([Cools & D'Esposito, 2011](#)). The spatial navigation task used in  
607 our study is quite demanding, such that YA though have higher baseline DA level could still  
608 benefit from the L-DOPA intervention, whereas in OA the task demand may still outweigh  
609 the benefit of L-DOPA intervention. While unexpected, these results could offer interesting  
610 insights into the complexity of how external DA medication might interact with neural  
611 differentiation and compensatory plasticity mechanisms that counteract age-related losses.  
612 One notable aspect in this regard is that we found no evidence of age-related dedifferentiation  
613 in HC or RSC, which speculatively could be a sign of compensatory mechanisms. It seems  
614 possible that DA interventions might only recover neural specificity in brain areas that are  
615 affected by age-related dedifferentiation. Contrary to this idea, we found no age-related  
616 L-DOPA effects in visual cortex, where dedifferentiation was observed – but this might be  
617 due to the relatively low D2 receptor density in this area ([Lidow, Goldman-Rakic, Rakic,](#)

618 & Innis, 1989). Another possibility is that we did not observe age-specific effects of L-  
619 DOPA on neural direction encoding in RSC and HC for the same reasons we did not find  
620 age-related dedifferentiation in these regions. According to this idea, compensatory factors  
621 that have mitigated dedifferentiation also affected the effectiveness of external dopamine  
622 administration, for instance because of changed connectivity. Both ideas remain speculative  
623 and further studies are needed to fully understand how the effects of L-DOPA interventions  
624 on neural direction encoding interact with age and dedifferentiation.

625 Beyond these main implications, a number of interesting observations arose that warrant  
626 further investigation. Although we did not find any main effects of session order, we found  
627 some indications that session order could influence the effect of L-DOPA on neural signals  
628 that underlie spatial navigation. Age-differences in learning were stronger when L-DOPA  
629 was administered in the second compared to the first session. In addition, we found tuning  
630 specificity in EVC and RSC to be enhanced by L-DOPA only in participants who received the  
631 drug in the second session. Stronger effects when DA is administered in a second session have  
632 previously been reported in the context of spatial navigation (Thurm et al., 2016). The reason  
633 why session order effects could exist in this context are numerous. Garrett et al. (2015), for  
634 instance, highlight two possible explanations in the context of DA effects on neural signal  
635 variability. One is that previous training may increase the amount of baseline DA-release,  
636 based on findings in rodents (Owesson-White, Cheer, Beyene, Carelli, & Wightman, 2008).  
637 A DA intervention could therefore lead to differing DA-availability depending on whether  
638 the participants had already been trained with the same or a similar task. A second possible  
639 explanation raised by Garrett et al. (2015) is that the environment is either learned in a  
640 state of higher or normal DA-availability. The state of the second sessions will consequently  
641 always be mismatched to the first session, leading to effects of drug administration given the  
642 respective session. Related to the first idea, we speculate that in our case general learning  
643 about the environment in a first placebo session could have established beneficial baseline  
644 for the effects of L-DOPA in the second session. Unfortunately, the present design is unfit  
645 to address such explanations and further evidence is warranted.

646 One open question is why the effect of L-DOPA on decoding in HC and RSC was not  
647 reflected in task performance, where no L-DOPA effect was found. In addition to generally

648 small effects on neural representations, another explanation might be that task performance  
649 did does only depend on direction signals, but also relies on distance estimation and using  
650 distal and local cues, processes which themselves are affected by age (Schuck et al., 2015).  
651 The task might therefore have been too complex to provide a suitable behavioral measure.  
652 Interestingly, however, we we did find some relationships between behavior and the specificity  
653 of directional information in visual cortex, indicating that neural markers might have different  
654 relations to performance in our task. This is shown by some of our results also offer insights  
655 about age-related changes in the context of spatial navigation more generally. The results  
656 in the EVC showed that OA exhibit lower precision of directional tuning functions. This  
657 is a replication of findings reported in an earlier study using a similar analysis approach  
658 (Koch et al., 2020). During natural navigation and the perception of direction vision plays a  
659 major role as it allows stable directional signals (Goodridge, 1998) and corrects and prevents  
660 the accumulation of errors during path integration (Jeffery, 2007). A less precise visual  
661 signal in OA could therefore influence spatial signals downstream and contribute towards the  
662 pronounced difficulties OA have in spatial tasks. Interestingly, we also found a relationship  
663 between EVC direction decoding in YA and performance on task, suggesting better spatial  
664 memory performance if walking direction could be decoded with higher accuracy. While this  
665 concurs with previous reports of a link between (non-spatial) memory and signal specificity  
666 (Koen et al., 2019; Sommer et al., 2019; St-Laurent et al., 2014), previous studies have mostly  
667 reported such links in older adults. Future work is required to further understand how age-  
668 related loss in specificity of visual signals might be involved in spatial cognition. That said,  
669 a simple propagation of less specific visual signals to the retrosplenial complex network seems  
670 unlikely, since there was no evidence for age-related dedifferentiation in the RSC or HC.

671 In summary, we provide first causal insights into the role of dopamine in the encod-  
672 ing of spatial direction signals in the human hippocampus. In addition, our findings show  
673 that dopamine also enhances direction encoding in retrosplenial cortex, albeit exclusively in  
674 younger adults. In combination with the replication of our own previous results (Koch et al.,  
675 2020), these findings offer insights into the neural processes underlying spatial navigation in  
676 the human brain, and how they are affected by age more generally.

677 **Code availability**

678 TBD

679 **Acknowledgement**

680 The study was supported by a DFG grant to SCL, FG, and MS (SFB 940-2/940-3). NWS  
681 was supported by an Independent Max Planck Research Group grant (M.TN.A.BILD0004)  
682 awarded by the Max Planck Society and a Starting Grant from the European Union (ERC-  
683 2019-StG REPLAY-852669). We want to thank Lorenz Gönner for his helpful comments on  
684 the manuscript.

685 **Conflict of interest**

686 The authors declare no conflicts of interest.

687 **References**

- 688 Abdulrahman, H., Fletcher, P. C., Bullmore, E., & Morcom, A. M. (2017).  
689 Dopamine and memory dedifferentiation in aging. *NeuroImage*, *153*, 211–220.  
690 doi: [10.1016/j.neuroimage.2015.03.031](https://doi.org/10.1016/j.neuroimage.2015.03.031)
- 691 Abraham, A., Pedregosa, F., Eickenberg, M., Gervais, P., Mueller, A., Kossaifi, J.,  
692 ... Varoquaux, G. (2014). Machine learning for neuroimaging with scikit-learn.  
693 *Frontiers in Neuroinformatics*, *8*. doi: [10.3389/fninf.2014.00014](https://doi.org/10.3389/fninf.2014.00014)
- 694 Avants, B., Epstein, C., Grossman, M., & Gee, J. (2008). Symmetric diffeomorphic  
695 image registration with cross-correlation: Evaluating automated labeling of  
696 elderly and neurodegenerative brain. *Medical Image Analysis*, *12*(1), 26-41.  
697 doi: [10.1016/j.media.2007.06.004](https://doi.org/10.1016/j.media.2007.06.004)
- 698 Averbeck, B. B., Latham, P. E., & Pouget, A. (2006). *Neural correlations, population*  
699 *coding and computation* (Vol. 7) (No. 5). doi: [10.1038/nrn1888](https://doi.org/10.1038/nrn1888)

- 700 Bäckman, L., Nyberg, L., Lindenberger, U., Li, S. C., & Farde, L. (2006). The  
701 correlative triad among aging, dopamine, and cognition: Current status and  
702 future prospects. *Neuroscience and Biobehavioral Reviews*, *30*(6), 791–807.  
703 doi: [10.1016/j.neubiorev.2006.06.005](https://doi.org/10.1016/j.neubiorev.2006.06.005)
- 704 Bates, D., Mächler, M., Bolker, B., & Walker, S. (2015). Fitting Linear Mixed-  
705 Effects Models Using lme4. *Journal of Statistical Software*, *67*(1), 1–48.  
706 doi: [10.18637/JSS.V067.I01](https://doi.org/10.18637/JSS.V067.I01)
- 707 Behzadi, Y., Restom, K., Liau, J., & Liu, T. T. (2007). A component based noise cor-  
708 rection method (CompCor) for BOLD and perfusion based fmri. *NeuroImage*,  
709 *37*(1), 90-101. doi: [10.1016/j.neuroimage.2007.04.042](https://doi.org/10.1016/j.neuroimage.2007.04.042)
- 710 Berger, B., Verney, C., Alvarez, C., Vigny, A., & Helle, K. B. (1985). New dopamin-  
711 ergic terminal fields in the motor, visual (area 18b) and retrosplenial cortex in  
712 the young and adult rat. Immunocytochemical and catecholamine histochemi-  
713 cal analyses. *Neuroscience*, *15*(4), 983–998. doi: [10.1016/0306-4522\(85\)90248-](https://doi.org/10.1016/0306-4522(85)90248-9)  
714 [9](https://doi.org/10.1016/0306-4522(85)90248-9)
- 715 Burgess, N., Maguire, E. A., & O’Keefe, J. (2002). *The human hippocampus and*  
716 *spatial and episodic memory* (Vol. 35) (No. 4). Cell Press. doi: [10.1016/S0896-](https://doi.org/10.1016/S0896-6273(02)00830-9)  
717 [6273\(02\)00830-9](https://doi.org/10.1016/S0896-6273(02)00830-9)
- 718 Burles, F., Slone, E., & Iaria, G. (2017). Dorso-medial and ventro-lateral  
719 functional specialization of the human retrosplenial complex in spatial up-  
720 dating and orienting. *Brain Structure and Function*, *222*(3), 1481–1493.  
721 doi: [10.1007/s00429-016-1288-8](https://doi.org/10.1007/s00429-016-1288-8)
- 722 Cacucci, F., Lever, C., Wills, T. J., Burgess, N., & O’Keefe, J. (2004). Theta-  
723 modulated place-by-direction cells in the hippocampal formation in the rat.  
724 *Journal of Neuroscience*, *24*(38), 8265–8277. doi: [10.1523/JNEUROSCI.2635-](https://doi.org/10.1523/JNEUROSCI.2635-04.2004)  
725 [04.2004](https://doi.org/10.1523/JNEUROSCI.2635-04.2004)

- 726 Carp, J., Park, J., Hebrank, A., Park, D. C., & Polk, T. A. (2011). Age-Related  
727 Neural Dedifferentiation in the Motor System. *PLoS ONE*, *6*(12), e29411.  
728 doi: [10.1371/journal.pone.0029411](https://doi.org/10.1371/journal.pone.0029411)
- 729 Carp, J., Park, J., Polk, T. A., & Park, D. C. (2011). Age differences in neural  
730 distinctiveness revealed by multi-voxel pattern analysis. *NeuroImage*, *56*(2),  
731 736–743. doi: [10.1016/j.neuroimage.2010.04.267](https://doi.org/10.1016/j.neuroimage.2010.04.267)
- 732 Chersi, F., & Burgess, N. (2015). *The Cognitive Architecture of Spatial Naviga-*  
733 *tion: Hippocampal and Striatal Contributions* (Vol. 88) (No. 1). Cell Press.  
734 doi: [10.1016/j.neuron.2015.09.021](https://doi.org/10.1016/j.neuron.2015.09.021)
- 735 Chowdhury, R., Guitart-Masip, M., Lambert, C., Dayan, P., Huys, Q., Düzel, E., &  
736 Dolan, R. J. (2013). Dopamine restores reward prediction errors in old age.  
737 *Nature Neuroscience*, *16*(5), 648–653. doi: [10.1038/nn.3364](https://doi.org/10.1038/nn.3364)
- 738 Cohen, J. D., & Servan-Schreiber, D. (1992). Context, Cortex, and Dopamine: A  
739 Connectionist Approach to Behavior and Biology in Schizophrenia. *Psycholog-*  
740 *ical Review*, *99*(1), 45–77. doi: [10.1037/0033-295X.99.1.45](https://doi.org/10.1037/0033-295X.99.1.45)
- 741 Cools, R., & D'Esposito, M. (2011). *Inverted-U-shaped dopamine actions on hu-*  
742 *man working memory and cognitive control* (Vol. 69) (No. 12). Elsevier.  
743 doi: [10.1016/j.biopsycho.2011.03.028](https://doi.org/10.1016/j.biopsycho.2011.03.028)
- 744 Cox, R. W., & Hyde, J. S. (1997). Software tools for analysis and visualization of  
745 fmri data. *NMR in Biomedicine*, *10*(4-5), 171-178. doi: [10.1002/\(SICI\)1099-  
746 1492\(199706/08\)10:4/5<171::AID-NBM453>3.0.CO;2-L](https://doi.org/10.1002/(SICI)1099-1492(199706/08)10:4/5<171::AID-NBM453>3.0.CO;2-L)
- 747 Dale, A. M., Fischl, B., & Sereno, M. I. (1999). Cortical surface-based analy-  
748 sis: I. segmentation and surface reconstruction. *NeuroImage*, *9*(2), 179-194.  
749 doi: [10.1006/nimg.1998.0395](https://doi.org/10.1006/nimg.1998.0395)
- 750 El-Ghundi, M., Fletcher, P. J., Drago, J., Sibley, D. R., O'Dowd, B. F., & George,  
751 S. R. (1999). Spatial learning deficit in dopamine D1 receptor knockout

- 752 mice. *European Journal of Pharmacology*, 383(2), 95–106. doi: [10.1016/S0014-](https://doi.org/10.1016/S0014-2999(99)00573-7)
- 753 [2999\(99\)00573-7](https://doi.org/10.1016/S0014-2999(99)00573-7)
- 754 Esteban, O., Birman, D., Schaer, M., Koyejo, O. O., Poldrack, R. A., & Gorgolewski, K. J. (2017). MRIQC: Advancing the automatic prediction of
- 755 image quality in MRI from unseen sites. *PLoS ONE*, 12(9), e0184661.
- 756 doi: [10.1371/journal.pone.0184661](https://doi.org/10.1371/journal.pone.0184661)
- 757
- 758 Esteban, O., Blair, R., Markiewicz, C. J., Berleant, S. L., Moodie, C., Ma, F., ...
- 759 Gorgolewski, K. J. (2018). fmriprep. *Software*. doi: [10.5281/zenodo.852659](https://doi.org/10.5281/zenodo.852659)
- 760 Esteban, O., Markiewicz, C., Blair, R. W., Moodie, C., Isik, A. I., Erramuzpe Aliaga,
- 761 A., ... Gorgolewski, K. J. (2018). fMRIPrep: a robust preprocessing pipeline
- 762 for functional MRI. *Nature Methods*. doi: [10.1038/s41592-018-0235-4](https://doi.org/10.1038/s41592-018-0235-4)
- 763 Flossmann, T., & Rochefort, N. L. (2021). *Spatial navigation signals in rodent visual*
- 764 *cortex* (Vol. 67). Elsevier Ltd. doi: [10.1016/j.comb.2020.11.004](https://doi.org/10.1016/j.comb.2020.11.004)
- 765 Fonov, V., Evans, A., McKinstry, R., Almlil, C., & Collins, D. (2009). Unbiased
- 766 nonlinear average age-appropriate brain templates from birth to adulthood.
- 767 *NeuroImage*, 47, Supplement 1, S102. doi: [10.1016/S1053-8119\(09\)70884-5](https://doi.org/10.1016/S1053-8119(09)70884-5)
- 768 Garrett, D. D., Nagel, I. E., Preuschhof, C., Burzynska, A. Z., Marchner, J., Wiegert,
- 769 S., ... Lindenberger, U. (2015). Amphetamine modulates brain signal vari-
- 770 ability and working memory in younger and older adults. *Proceedings of the*
- 771 *National Academy of Sciences of the United States of America*, 112(24), 7593–
- 772 7598. doi: [10.1073/pnas.1504090112](https://doi.org/10.1073/pnas.1504090112)
- 773 Goodridge, J. P. (1998). Cue control and head direction cells. *Behavioral Neuro-*
- 774 *science*, 112(4), 749. doi: [10.1037/0735-7044.112.4.749](https://doi.org/10.1037/0735-7044.112.4.749)
- 775 Gorgolewski, K., Burns, C. D., Madison, C., Clark, D., Halchenko, Y. O., Waskom,
- 776 M. L., & Ghosh, S. (2011). Nipype: a flexible, lightweight and extensible
- 777 neuroimaging data processing framework in python. *Frontiers in Neuroinfor-*

- 778 *matics*, 5, 13. doi: [10.3389/fninf.2011.00013](https://doi.org/10.3389/fninf.2011.00013)
- 779 Gorgolewski, K., Esteban, O., Markiewicz, C. J., Ziegler, E., Ellis, D. G., Notter,  
780 M. P., ... Ghosh, S. (2018). Nipype. *Software*. doi: [10.5281/zenodo.596855](https://doi.org/10.5281/zenodo.596855)
- 781 Granado, N., Ortiz, O., Suárez, L. M., Martín, E. D., Ceña, V., Solís, J. M., &  
782 Moratalla, R. (2008). D1 but not D5 dopamine receptors are critical for LTP,  
783 spatial learning, and LTP-induced arc and zif268 expression in the hippocam-  
784 pus. *Cerebral Cortex*, 18(1), 1–12. doi: [10.1093/cercor/bhm026](https://doi.org/10.1093/cercor/bhm026)
- 785 Greve, D. N., & Fischl, B. (2009). Accurate and robust brain image  
786 alignment using boundary-based registration. *NeuroImage*, 48(1), 63–72.  
787 doi: [10.1016/j.neuroimage.2009.06.060](https://doi.org/10.1016/j.neuroimage.2009.06.060)
- 788 Guitchounts, G., Masís, J., Wolff, S. B., & Cox, D. (2020). Encoding of 3D Head  
789 Orienting Movements in the Primary Visual Cortex. *Neuron*, 108(3), 512–  
790 525.e4. doi: [10.1016/j.neuron.2020.07.014](https://doi.org/10.1016/j.neuron.2020.07.014)
- 791 Jeffery, K. J. (2007). Integration of the sensory inputs to place cells: What, where,  
792 why, and how? *Hippocampus*, 17(9), 775–785. doi: [10.1002/HIPO.20322](https://doi.org/10.1002/HIPO.20322)
- 793 Jenkinson, M., Bannister, P., Brady, M., & Smith, S. (2002). Improved optimization  
794 for the robust and accurate linear registration and motion correction of brain  
795 images. *NeuroImage*, 17(2), 825–841. doi: [10.1006/nimg.2002.1132](https://doi.org/10.1006/nimg.2002.1132)
- 796 Kentros, C. G., Agnihotri, N. T., Streater, S., Hawkins, R. D., & Kandel, E. R.  
797 (2004). Increased attention to spatial context increases both place field sta-  
798 bility and spatial memory. *Neuron*, 42(2), 283–295. doi: [10.1016/S0896-  
799 6273\(04\)00192-8](https://doi.org/10.1016/S0896-6273(04)00192-8)
- 800 Klein, A., Ghosh, S. S., Bao, F. S., Giard, J., Häme, Y., Stavsky, E., ... Keshavan,  
801 A. (2017). Mindboggling morphometry of human brains. *PLoS Computational*  
802 *Biology*, 13(2), e1005350. doi: [10.1371/journal.pcbi.1005350](https://doi.org/10.1371/journal.pcbi.1005350)
- 803 Kobelt, M., Sommer, V. R., Keresztes, A., Werkle-Bergner, M., & Sander,



- 804 M. C. (2021). Tracking Age Differences in Neural Distinctiveness across  
805 Representational Levels. *The Journal of Neuroscience*, *41*(15), 3499–3511.  
806 doi: [10.1523/jneurosci.2038-20.2021](https://doi.org/10.1523/jneurosci.2038-20.2021)
- 807 Koch, C., Li, S.-C., Polk, T. A., & Schuck, N. W. (2020). Effects of aging on  
808 encoding of walking direction in the human brain. *Neuropsychologia*, *141*,  
809 107379. doi: [10.1016/j.neuropsychologia.2020.107379](https://doi.org/10.1016/j.neuropsychologia.2020.107379)
- 810 Koen, J. D., Hauck, N., & Rugg, M. D. (2019). The relationship between age,  
811 neural differentiation, and memory performance. *Journal of Neuroscience*,  
812 *39*(1), 149–162. doi: [10.1523/JNEUROSCI.1498-18.2018](https://doi.org/10.1523/JNEUROSCI.1498-18.2018)
- 813 Kravitz, D. J., Saleem, K. S., Baker, C. I., & Mishkin, M. (2011). A new neural  
814 framework for visuospatial processing. *Nature Reviews Neuroscience*, *12*(4),  
815 217–230. doi: [10.1038/nrn3008](https://doi.org/10.1038/nrn3008)
- 816 Kroemer, N. B., Lee, Y., Pooeh, S., Eppinger, B., Goschke, T., & Smolka,  
817 M. N. (2019). L-DOPA reduces model-free control of behavior by at-  
818 tenuating the transfer of value to action. *NeuroImage*, *186*, 113–125.  
819 doi: [10.1016/j.neuroimage.2018.10.075](https://doi.org/10.1016/j.neuroimage.2018.10.075)
- 820 Lanczos, C. (1964). Evaluation of noisy data. *Journal of the Society for In-*  
821 *dustrial and Applied Mathematics Series B Numerical Analysis*, *1*(1), 76-85.  
822 doi: [10.1137/0701007](https://doi.org/10.1137/0701007)
- 823 Lenth, R. V. (2021). emmeans: Estimated marginal means, aka least-squares means  
824 [Computer software manual]. (R package version 1.6.1)
- 825 Lester, A. W., Moffat, S. D., Wiener, J. M., Barnes, C. A., & Wolbers, T.  
826 (2017). The Aging Navigational System. *Neuron*, *95*(5), 1019–1035.  
827 doi: [10.1016/J.NEURON.2017.06.037](https://doi.org/10.1016/J.NEURON.2017.06.037)
- 828 Leventhal, A. G., Wang, Y., Pu, M., Zhou, Y., & Ma, Y. (2003). GABA and its  
829 agonists improved visual cortical function in senescent monkeys. *Science (New*

- 830           York, N. Y.), 300(5620), 812–5. doi: [10.1126/science.1082874](https://doi.org/10.1126/science.1082874)
- 831       Li, S. C., Lindenberger, U., & Bäckman, L. (2010). Dopaminergic modulation of  
832           cognition across the life span. *Neuroscience and Biobehavioral Reviews*, 34(5),  
833           625–630. doi: [10.1016/j.neubiorev.2010.02.003](https://doi.org/10.1016/j.neubiorev.2010.02.003)
- 834       Li, S. C., Lindenberger, U., Hommel, B., Aschersleben, G., Prinz, W., & Baltes, P. B.  
835           (2004). Transformations in the Couplings Among Intellectual Abilities and  
836           Constituent Cognitive Processes Across the Life Span. *Psychological Science*,  
837           15(3), 155–163. doi: [10.1111/j.0956-7976.2004.01503003.x](https://doi.org/10.1111/j.0956-7976.2004.01503003.x)
- 838       Li, S.-C., Lindenberger, U., & Sikström, S. (2001). Aging cognition: from neuro-  
839           modulation to representation. *Trends in Cognitive Sciences*, 5(11), 479–486.  
840           doi: [10.1016/S1364-6613\(00\)01769-1](https://doi.org/10.1016/S1364-6613(00)01769-1)
- 841       Li, S. C., Papenberg, G., Nagel, I. E., Preuschhof, C., Schröder, J., Nietfeld, W., ...  
842           Bäckman, L. (2013). Aging magnifies the effects of dopamine transporter and  
843           D2 receptor genes on backward serial memory. *Neurobiology of Aging*, 34(1),  
844           358.e1–358.e10. doi: [10.1016/j.neurobiolaging.2012.08.001](https://doi.org/10.1016/j.neurobiolaging.2012.08.001)
- 845       Li, S.-C., & Rieckmann, A. (2014). Neuromodulation and aging: implications of  
846           aging neuronal gain control on cognition. *Current Opinion in Neurobiology*,  
847           29, 148–158. doi: [10.1016/j.conb.2014.07.009](https://doi.org/10.1016/j.conb.2014.07.009)
- 848       Liang, Z., Yang, Y., Li, G., Zhang, J., Wang, Y., Zhou, Y., & Lev-  
849           enthal, A. G. (2010). Aging affects the direction selectivity of  
850           MT cells in rhesus monkeys. *Neurobiology of Aging*, 31(5), 863–873.  
851           doi: [10.1016/J.NEUROBIOLAGING.2008.06.013](https://doi.org/10.1016/J.NEUROBIOLAGING.2008.06.013)
- 852       Lidow, M. S., Goldman-Rakic, P. S., Rakic, P., & Innis, R. B. (1989). Dopamine D2  
853           receptors in the cerebral cortex: distribution and pharmacological characteri-  
854           zation with [3H]raclopride. *Proceedings of the National Academy of Sciences*,  
855           86(16), 6412–6416. doi: [10.1073/PNAS.86.16.6412](https://doi.org/10.1073/PNAS.86.16.6412)

- 856       Mazziotta, J. C., Toga, A. W., Evans, A., Fox, P., & Lancaster, J. (1995). A Proba-  
857               bilistic Atlas of the Human Brain: Theory and Rationale for Its Development:  
858               The International Consortium for Brain Mapping (ICBM). *NeuroImage*, *2*(2,  
859               Part A), 89–101. doi: [10.1006/nimg.1995.1012](https://doi.org/10.1006/nimg.1995.1012)
- 860       McNamara, C. G., & Dupret, D. (2017). Two sources of dopamine for the hippocam-  
861               pus. *Trends in Neurosciences*, *40*(7), 383–384. doi: [10.1016/j.tins.2017.05.005](https://doi.org/10.1016/j.tins.2017.05.005)
- 862       Moffat, S. D. (2009). Aging and Spatial Navigation: What Do We Know and Where  
863               Do We Go? *Neuropsychology Review*, *19*(4), 478–489. doi: [10.1007/s11065-  
864               009-9120-3](https://doi.org/10.1007/s11065-009-9120-3)
- 865       Owesson-White, C. A., Cheer, J. F., Beyene, M., Carelli, R. M., & Wightman,  
866               R. M. (2008). Dynamic changes in accumbens dopamine correlate with  
867               learning during intracranial self-stimulation. *Proceedings of the National  
868               Academy of Sciences of the United States of America*, *105*(33), 11957–11962.  
869               doi: [10.1073/pnas.0803896105](https://doi.org/10.1073/pnas.0803896105)
- 870       Papenberg, G., Bäckman, L., Nagel, I. E., Nietfeld, W., Schröder, J., Bertram, L.,  
871               ... Li, S. C. (2014). COMT polymorphism and memory dedifferentiation in  
872               old age. *Psychology and Aging*, *29*(2), 374–383. doi: [10.1037/a0033225](https://doi.org/10.1037/a0033225)
- 873       Park, D. C., Polk, T. A., Park, R., Minear, M., Savage, A., & Smith, M. R. (2004).  
874               From The Cover: Aging reduces neural specialization in ventral visual cor-  
875               tex. *Proceedings of the National Academy of Sciences*, *101*(35), 13091–13095.  
876               doi: [10.1073/pnas.0405148101](https://doi.org/10.1073/pnas.0405148101)
- 877       Pedregosa, F., Michel, V., Grisel, O., Blondel, M., Prettenhofer, P., Weiss, R., ...  
878               Duchesnay, É. (2011). Scikit-learn: Machine Learning in Python. *Journal of  
879               Machine Learning Research*, *12*, 2825–2830. doi: [10.1007/s13398-014-0173-  
880               7.2](https://doi.org/10.1007/s13398-014-0173-7.2)
- 881       Power, J. D., Mitra, A., Laumann, T. O., Snyder, A. Z., Schlaggar, B. L., &

882 Petersen, S. E. (2014). Methods to detect, characterize, and remove mo-  
883 tion artifact in resting state fmri. *NeuroImage*, *84*(Supplement C), 320-341.  
884 doi: [10.1016/j.neuroimage.2013.08.048](https://doi.org/10.1016/j.neuroimage.2013.08.048)

885 R Core Team. (2021). R: A language and environment for statistical computing  
886 [Computer software manual]. Vienna, Austria.

887 Satterthwaite, T. D., Elliott, M. A., Gerraty, R. T., Ruparel, K., Loughhead, J.,  
888 Calkins, M. E., ... Wolf, D. H. (2013). An improved framework for con-  
889 found regression and filtering for control of motion artifact in the preprocess-  
890 ing of resting-state functional connectivity data. *NeuroImage*, *64*(1), 240–256.  
891 doi: [10.1016/j.neuroimage.2012.08.052](https://doi.org/10.1016/j.neuroimage.2012.08.052)

892 Schmolesky, M. T., Wang, Y., Pu, M., & Leventhal, A. G. (2000). Degradation of  
893 stimulus selectivity of visual cortical cells in senescent rhesus monkeys. *Nature*  
894 *Neuroscience*, *3*(4), 384–390. doi: [10.1038/73957](https://doi.org/10.1038/73957)

895 Schuck, N. W., Doeller, C. F., Polk, T. A., Lindenberger, U., & Li, S. C. (2015).  
896 Human aging alters the neural computation and representation of space. *Neu-*  
897 *roImage*, *117*, 141–150. doi: [10.1016/j.neuroimage.2015.05.031](https://doi.org/10.1016/j.neuroimage.2015.05.031)

898 Schuck, N. W., Doeller, C. F., Schjeide, B.-M. M., Schröder, J., Frensch, P. A.,  
899 Bertram, L., & Li, S.-C. (2013). Aging and KIBRA/WWC1 genotype affect  
900 spatial memory processes in a virtual navigation task. *Hippocampus*, *23*(10),  
901 919–930. doi: [10.1002/hipo.22148](https://doi.org/10.1002/hipo.22148)

902 Schuck, N. W., Petok, J. R., Meeter, M., Schjeide, B. M. M., Schröder,  
903 J., Bertram, L., ... Li, S. C. (2018). Aging and a genetic KI-  
904 BRA polymorphism interactively affect feedback- and observation-based  
905 probabilistic classification learning. *Neurobiology of Aging*, *61*, 36–43.  
906 doi: [10.1016/j.neurobiolaging.2017.08.026](https://doi.org/10.1016/j.neurobiolaging.2017.08.026)

907 Servan-Schreiber, D., Printz, H., & Cohen, J. (1990). A network model of cate-

- 908 cholamine effects: gain, signal-to-noise ratio, and behavior. *Science*, *249*(4971),  
909 892–895. doi: [10.1126/science.2392679](https://doi.org/10.1126/science.2392679)
- 910 Shine, J. P., Valdés-Herrera, J. P., Hegarty, M., & Wolbers, T. (2016).  
911 The human retrosplenial cortex and thalamus code head direction in  
912 a global reference frame. *Journal of Neuroscience*, *36*(24), 6371–6381.  
913 doi: [10.1523/JNEUROSCI.1268-15.2016](https://doi.org/10.1523/JNEUROSCI.1268-15.2016)
- 914 Sommer, V. R., Fandakova, Y., Grandy, T. H., Shing, Y. L., Werkle-Bergner, M., &  
915 Sander, M. C. (2019). Neural Pattern Similarity Differentially Relates to Mem-  
916 ory Performance in Younger and Older Adults. *The Journal of Neuroscience*,  
917 *39*(41), 8089–8099. doi: [10.1523/JNEUROSCI.0197-19.2019](https://doi.org/10.1523/JNEUROSCI.0197-19.2019)
- 918 Spiers, H. J., & Barry, C. (2015). Neural systems supporting navigation. *Current*  
919 *Opinion in Behavioral Sciences*, *1*, 47–55. doi: [10.1016/j.cobeha.2014.08.005](https://doi.org/10.1016/j.cobeha.2014.08.005)
- 920 St-Laurent, M., Abdi, H., Bondad, A., & Buchsbaum, B. R. (2014). Memory  
921 reactivation in healthy aging: Evidence of stimulus-specific dedifferentiation.  
922 *Journal of Neuroscience*, *34*(12), 4175–4186. doi: [10.1523/JNEUROSCI.3054-](https://doi.org/10.1523/JNEUROSCI.3054-13.2014)  
923 [13.2014](https://doi.org/10.1523/JNEUROSCI.3054-13.2014)
- 924 Taube, J. S. (2007). The Head Direction Signal: Origins and Sensory-  
925 Motor Integration. *Annual Review of Neuroscience*, *30*(1), 181–207.  
926 doi: [10.1146/annurev.neuro.29.051605.112854](https://doi.org/10.1146/annurev.neuro.29.051605.112854)
- 927 Taube, J. S., Muller, R. U., & Ranck, J. B. (1990). Head-direction cells recorded from  
928 the postsubiculum in freely moving rats. II. Effects of environmental manipu-  
929 lations. *Journal of Neuroscience*, *10*(2), 436–447. doi: [10.1523/jneurosci.10-](https://doi.org/10.1523/jneurosci.10-02-00436.1990)  
930 [02-00436.1990](https://doi.org/10.1523/jneurosci.10-02-00436.1990)
- 931 Thurley, K., Senn, W., & Lüscher, H. R. (2008). Dopamine increases the gain  
932 of the input-output response of rat prefrontal pyramidal neurons. *Journal of*  
933 *Neurophysiology*, *99*(6), 2985–2997. doi: [10.1152/jn.01098.2007](https://doi.org/10.1152/jn.01098.2007)

- 934 Thurm, F., Schuck, N. W., Fauser, M., Doeller, C. F., Stankevich, Y., Evens,  
935 R., ... Li, S.-C. (2016). Dopamine modulation of spatial naviga-  
936 tion memory in Parkinson's disease. *Neurobiology of Aging*, *38*, 93–103.  
937 doi: [10.1016/j.neurobiolaging.2015.10.019](https://doi.org/10.1016/j.neurobiolaging.2015.10.019)
- 938 Tustison, N. J., Avants, B. B., Cook, P. A., Zheng, Y., Egan, A., Yushkevich, P. A.,  
939 & Gee, J. C. (2010). N4itk: Improved n3 bias correction. *IEEE Transactions*  
940 *on Medical Imaging*, *29*(6), 1310-1320. doi: [10.1109/TMI.2010.2046908](https://doi.org/10.1109/TMI.2010.2046908)
- 941 Vijayraghavan, S., Wang, M., Birnbaum, S. G., Williams, G. V., & Arnsten,  
942 A. F. (2007). Inverted-U dopamine D1 receptor actions on prefrontal neu-  
943 rons engaged in working memory. *Nature Neuroscience*, *10*(3), 376–384.  
944 doi: [10.1038/nm1846](https://doi.org/10.1038/nm1846)
- 945 Volkow, N. D., Gur, R. C., Wang, G. J., Fowler, J. S., Moberg, P. J., Ding, Y. S.,  
946 ... Logan, J. (1998). Association between decline in brain dopamine activity  
947 with age and cognitive and motor impairment in healthy individuals. *American*  
948 *Journal of Psychiatry*, *155*(3), 344–349. doi: [10.1176/ajp.155.3.344](https://doi.org/10.1176/ajp.155.3.344)
- 949 Wickham, H. (2016). *ggplot2: Elegant graphics for data analysis*. Springer-Verlag  
950 New York.
- 951 Wolbers, T., Dudchenko, P. A., & Wood, E. R. (2014). *Spatial memory - A unique*  
952 *window into healthy and pathological aging* (Vol. 6) (No. MAR). Frontiers  
953 Media SA. doi: [10.3389/fnagi.2014.00035](https://doi.org/10.3389/fnagi.2014.00035)
- 954 Zhang, Y., Brady, M., & Smith, S. (2001). Segmentation of brain MR im-  
955 ages through a hidden markov random field model and the expectation-  
956 maximization algorithm. *IEEE Transactions on Medical Imaging*, *20*(1), 45-57.  
957 doi: [10.1109/42.906424](https://doi.org/10.1109/42.906424)
